# Supplementary material for: A Bioluminescent 3CLPro Activity Assay to Monitor SARS-CoV-2 Replication and Identify Inhibitors
Source: MDPI journal article supplement (doi:10.3390/v13091814), 2021-09-12
Supplement: s1 [file s1]

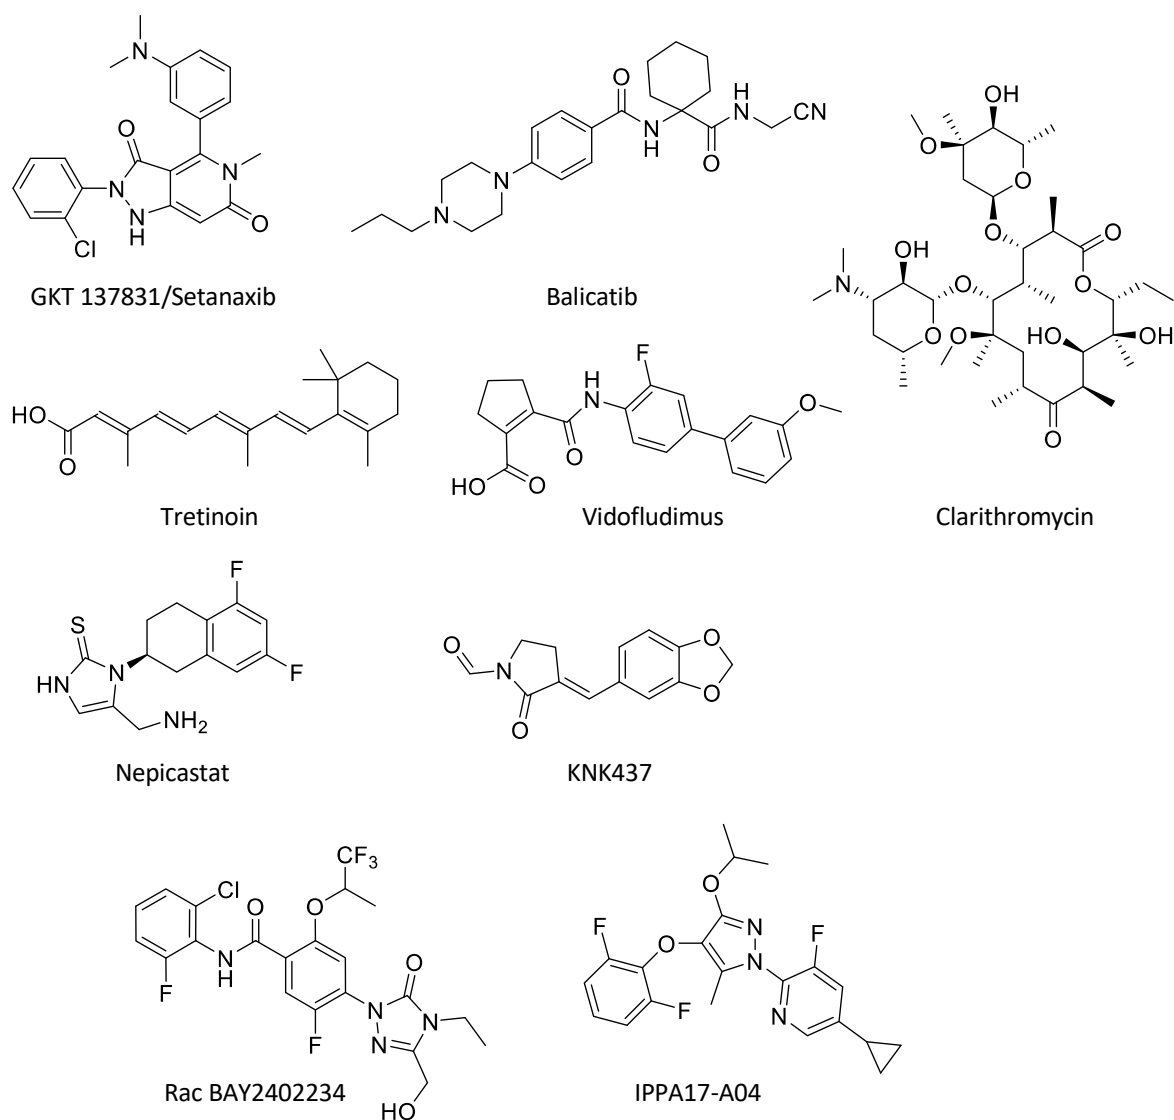

**Figure S1.** Structures of the compounds used in this study.

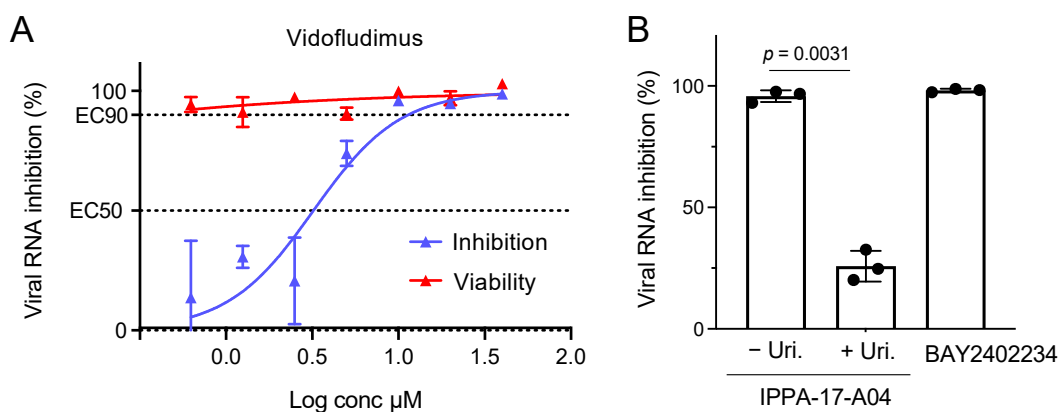

**Figure S2.** Inhibition of SARS-CoV-2 replication by DHODH inhibitors. **(A)** Vero cells were infected SARS-CoV-2 (MOI = 0.002) and cultured with increasing concentration of Vidofludimus or DMSO alone. After 48 h, culture supernatants were collected and viral particles quantified by RT-qPCR. The impact of Vidofludimus on cellular viability and proliferation was determined in uninfected cultures using the CellTiter-Blue reagent. Results were expressed as a percentage of inhibition relative to

control wells. **(B)** Vero cells were infected SARS-CoV-2 (MOI = 0.002) and cultured with DMSO alone, IPPA17-A04 (0.5  $\mu$ M) in the absence or presence of uridine (120  $\mu$ M) or BAY2402234 (0.6  $\mu$ M). After 48 h, culture supernatants were collected and viral particles quantified by RT-qPCR. Data correspond to means  $\pm$  SEM from one experiment in triplicate and statistical significance was determined by Student's t-test.

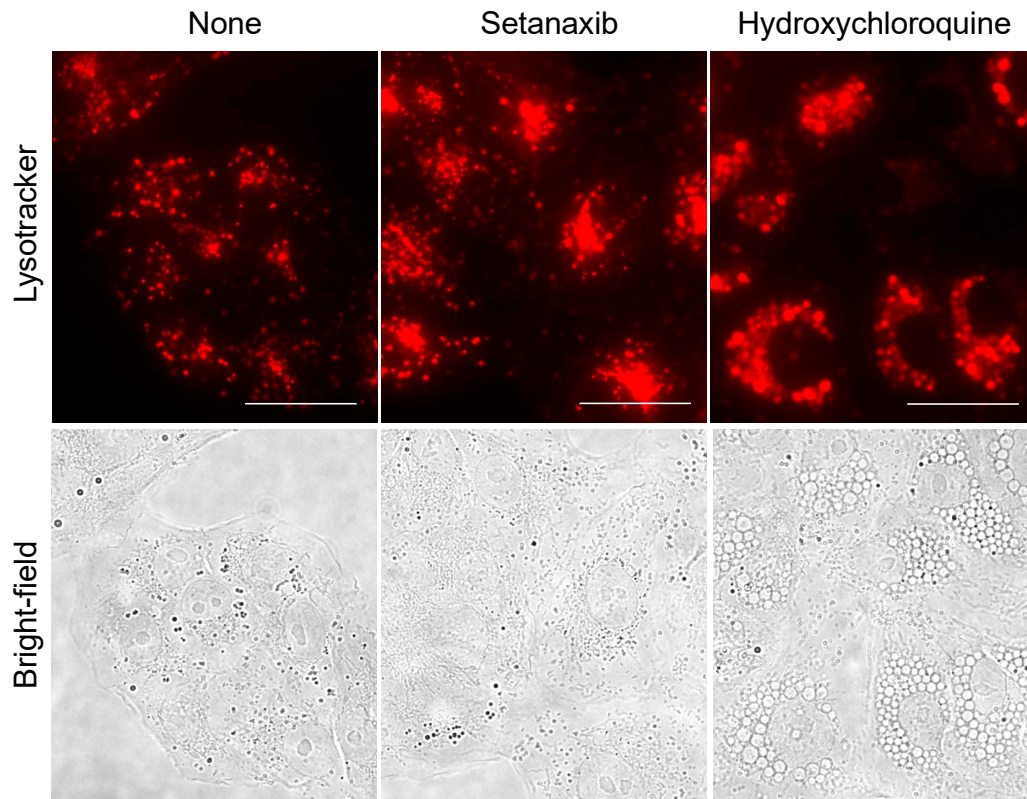

**Figure S3.** Lysosomal staining in Setanaxib-treated cells. To determine the potential impact of Setanaxib on lysosomes, Vero cells were cultured alone or with Setanaxib (25  $\mu$ M). Hydroxychloroquine was used as a reference lysosomotropic drug (50  $\mu$ M). After 4 h at 37  $^{\circ}$ C, lysosomes were stained with LysoTracker Deep Red and imaged by fluorescence microscopy. Scale bar is 20  $\mu$ m.
